# Supplementary material
Source: PubMed Central journal article supplement (PMC8034409)
Supplement: NIHMS1671070-supplement-Materials_list.pdf [file NIHMS1671070-supplement-Materials_list.pdf]

# Recurrent *Escherichia coli* Urinary Tract Infection Triggered by *Gardnerella vaginalis* Bladder Exposure in Mice

Valerie P. O'Brien<sup>1,2,6</sup>, Matthew S. Joens<sup>3,7</sup>, Amanda L. Lewis<sup>1,2,4,8</sup>, Nicole M. Gilbert<sup>2,5</sup>

<sup>1</sup>Department of Molecular Microbiology, Washington University School of Medicine in Saint Louis <sup>2</sup>Center for Women's Infectious Disease Research, Washington University School of Medicine in Saint Louis <sup>3</sup>Center for Cellular Imaging, Washington University School of Medicine in Saint Louis

<sup>4</sup>Department of Obstetrics and Gynecology, Washington University School of Medicine in Saint Louis <sup>5</sup>Department of Pediatrics, Washington University School of Medicine in Saint Louis <sup>6</sup>Fred Hutchinson Cancer Research Center <sup>7</sup>TESCAN USA, Inc. <sup>8</sup>University of California San Diego

## Corresponding Author

Nicole M. Gilbert  
gilbert@wustl.edu

## Citation

O'Brien, V.P., Joens, M.S., Lewis, A.L., Gilbert, N.M. Recurrent *Escherichia coli* Urinary Tract Infection Triggered by *Gardnerella vaginalis* Bladder Exposure in Mice. *J. Vis. Exp.* (), e61967, doi:10.3791/61967 (2020).

## Date Published

December 4, 2020

## DOI

10.3791/61967

## URL

jove.com/video/61967

## Materials

| Name                            | Company   | Catalog Number | Comments                                    |
|---------------------------------|-----------|----------------|---------------------------------------------|
| 30G x 1/2 needles               | BD        | 305106         | for catheters                               |
| 5 1/2" straight forcep hemostat | McKesson  | 487377         | <i>in situ</i> bladder fixation             |
| ACE 600 Sputter coater          | Leica     |                | SEM sample processing                       |
| aluminum SEM stub               | Ted Pella | 16111          | SEM sample processing                       |
| Calcium chloride                | EMS       | 12340          | <i>in situ</i> bladder fixation             |
| conductive carbon adhesive tab  | Ted Pella | 16084-1        | SEM sample processing                       |
| Conductive silver paint         | Ted Pella | 16034          | SEM sample processing                       |
| CPD 300 Critical Point Drier    | Leica     |                | SEM sample processing                       |
| Cytofunnel metal clip           | Simport   | M964B          | cytospun urinalysis                         |
| Ethanol                         | EMS       | 15050          | SEM sample processing                       |
| Glucose                         | Sigma     | G7528          | for NYCIII <i>G. vaginalis</i> growth media |
| glutaraldehyde                  | EMS       | 16320          | <i>in situ</i> bladder fixation             |
| Hema 3 staining kit             | Fisher    | 23123869       | cytospun urinalysis                         |
| HEPES                           | Cellgro   | 25-060-CI      | for NYCIII <i>G. vaginalis</i> growth media |
| iridium                         | Ted Pella | 91120          | SEM sample processing                       |
| isofluorane                     |           |                | mouse anaesthesia                           |
| kanamycin                       | Gibco     | 11815024       | add to UPEC LB selective plates (50 ug/mL)  |
| Luria-Bertani agar              | BD        | DF0445174      | UPEC growth plates                          |
| Luria-Bertani broth             | BD        | DF0446173      | UPEC growth media                           |
| Merlin FE-SEM                   | Zeiss     |                | scanning electron microscope                |
| Milli-Q Water Purifier          | Millipore | IQ-7000        | SEM sample processing                       |
| NaCl                            | Sigma     | S3014          | for NYCIII <i>G. vaginalis</i> growth media |
| Olympus Vanox AHBT3 microscope  | Olympus   |                | cytospun urinalysis                         |

|                                     |                   |             |                                                              |
|-------------------------------------|-------------------|-------------|--------------------------------------------------------------|
| osmium tetroxide                    | EMS               | 19170       | SEM sample processing                                        |
| paraformaldehyde                    | EMS               | 15710       | <i>in situ</i> bladder fixation                              |
| polyethylene tubing                 | Intramedic        | 427401      | for catheters                                                |
| Proteose Peptone #3                 | Fisher            | DF-122-17-4 | for NYCIII <i>G. vaginalis</i> growth media                  |
| PTFE coated double edge razor blade | EMS               | 72000       | cutting bladders for SEM                                     |
| Shandon Cyto centrifuge             | Thermo Scientific | A78300002   | cytospun urinalysis                                          |
| Shandon cytofunnel filter           | Simport           | M965FWDV    | cytospun urinalysis                                          |
| Shandon Double cytofunnel           | Simport           | M964-1D     | cytospun urinalysis                                          |
| Shandon double cytoslides (coated)  | Thermo Scientific | 5991055     | cytospun urinalysis                                          |
| sodium cacodylate trihydrate        | EMS               | 12310       | <i>in situ</i> bladder fixation                              |
| spectrophotometer                   | BioChrom          | 80-3000-45  | measuring bacterial OD600                                    |
| streptomycin                        | Gibco             | 11860038    | add to <i>G. vaginalis</i> NYCIII selective plates (1 mg/mL) |
| tuberculin slip tip syringe         | BD                | 309659      | for catheters                                                |
| Yeast Extract                       | Fisher            | DF0127-17-9 | for NYCIII <i>G. vaginalis</i> growth media                  |
